# Supplementary material for: Machine Learning Reveals Missing Edges and Putative Interaction Mechanisms in Microbial Ecosystem Networks
Source: PubMed Central journal article supplement (PMC6208640; doi:10.1128/msystems.00181-18), 2018-10-30

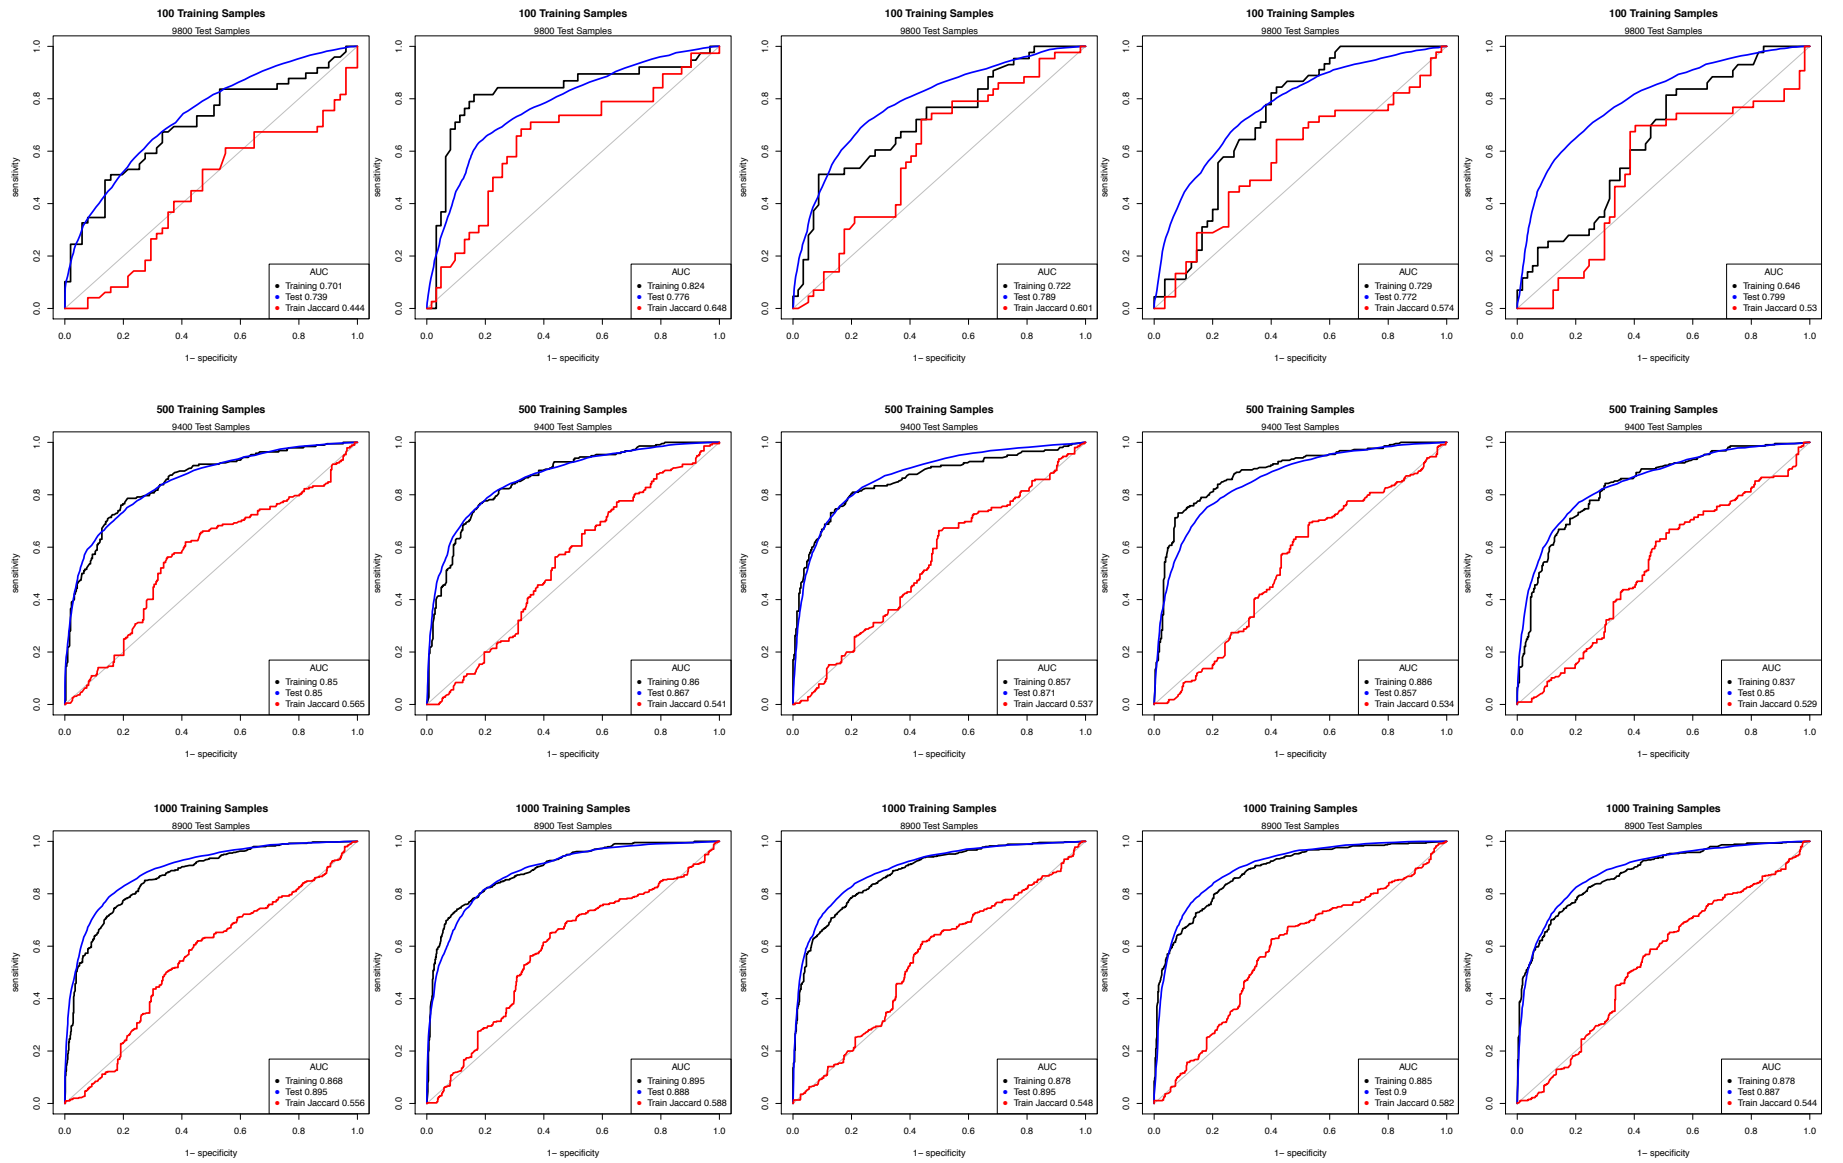

Supplement: sys005182279sf3.pdf [file sys005182279sf3.pdf]
