# Supplementary material for: Machine Learning Reveals Missing Edges and Putative Interaction Mechanisms in Microbial Ecosystem Networks
Source: PubMed Central journal article supplement (PMC6208640; doi:10.1128/msystems.00181-18), 2018-10-30
Supplement: sys005182279st5.pdf [file sys005182279st5.pdf]

| Responder                | Partner                         | top Module                                                                           | Contribution |
|--------------------------|---------------------------------|--------------------------------------------------------------------------------------|--------------|
| Bacillus toyonensis<br>1 | Bacillus toyonensis<br>2        | GraS-GraR (cationic antimicrobial peptide transport) two-component regulatory system | Survival     |
| Bacillus toyonensis<br>1 | Cupriavidus basilensis          | gamma-Hexachlorocyclohexane transport system                                         | Survival     |
| Bacillus toyonensis<br>1 | Bacillus amyloliquefaciens<br>1 | GraS-GraR (cationic antimicrobial peptide transport) two-component regulatory system | Survival     |
| Bacillus toyonensis<br>1 | Bacillus safensis               | GraS-GraR (cationic antimicrobial peptide transport) two-component regulatory system | Survival     |
| Bacillus toyonensis<br>1 | Bacillus amyloliquefaciens<br>2 | gamma-Hexachlorocyclohexane transport system                                         | Survival     |
| Bacillus toyonensis<br>1 | Bacillus altitudinis            | GraS-GraR (cationic antimicrobial peptide transport) two-component regulatory system | Survival     |
| Bacillus toyonensis<br>1 | Bacillus flexus                 | gamma-Hexachlorocyclohexane transport system                                         | Survival     |
| Bacillus toyonensis<br>1 | Bacillus aryabhatai<br>1        | gamma-Hexachlorocyclohexane transport system                                         | Survival     |

|                          |                                   |                                                         |          |
|--------------------------|-----------------------------------|---------------------------------------------------------|----------|
| Bacillus toyonensis<br>1 | Arthrobacter<br>humicola          | gamma-<br>Hexachlorocyclohex<br>ane transport<br>system | Survival |
| Bacillus toyonensis<br>1 | Arthrobacter<br>nitroguajacolicus | gamma-<br>Hexachlorocyclohex<br>ane transport<br>system | Survival |
| Bacillus toyonensis<br>1 | Bacillus aryabhatai<br>2          | gamma-<br>Hexachlorocyclohex<br>ane transport<br>system | Survival |
| Bacillus toyonensis<br>1 | Rummeliibacillus<br>pycinus       | gamma-<br>Hexachlorocyclohex<br>ane transport<br>system | Survival |
| Bacillus toyonensis<br>1 | Bacillus aryabhatai<br>3          | gamma-<br>Hexachlorocyclohex<br>ane transport<br>system | Survival |
| Bacillus toyonensis<br>1 | Arthrobacter<br>oxydans           | gamma-<br>Hexachlorocyclohex<br>ane transport<br>system | Survival |
| Bacillus toyonensis<br>1 | Bacillus simplex 2                | gamma-<br>Hexachlorocyclohex<br>ane transport<br>system | Survival |
| Bacillus toyonensis<br>1 | Bacillus simplex 1                | gamma-<br>Hexachlorocyclohex<br>ane transport<br>system | Survival |
| Bacillus toyonensis<br>2 | Bacillus toyonensis<br>1          | Glutamate transport<br>system                           | Survival |
| Bacillus toyonensis<br>2 | Bacillus toyonensis<br>3          | Glutamate transport<br>system                           | Survival |
| Bacillus toyonensis<br>2 | Cupriavidus<br>basilensis         | gamma-<br>Hexachlorocyclohex<br>ane transport<br>system | Survival |

|                          |                                    |                                                         |            |
|--------------------------|------------------------------------|---------------------------------------------------------|------------|
| Bacillus toyonensis<br>2 | Bacillus<br>amyloliquefaciens<br>1 | Glutamate transport<br>system                           | Extinction |
| Bacillus toyonensis<br>2 | Bacillus safensis                  | Glutamate transport<br>system                           | Survival   |
| Bacillus toyonensis<br>2 | Bacillus<br>amyloliquefaciens<br>2 | gamma-<br>Hexachlorocyclohex<br>ane transport<br>system | Survival   |
| Bacillus toyonensis<br>2 | Bacillus altitudinis               | Glutamate transport<br>system                           | Survival   |
| Bacillus toyonensis<br>2 | Bacillus flexus                    | gamma-<br>Hexachlorocyclohex<br>ane transport<br>system | Survival   |
| Bacillus toyonensis<br>2 | Bacillus aryabhatai<br>1           | gamma-<br>Hexachlorocyclohex<br>ane transport<br>system | Survival   |
| Bacillus toyonensis<br>2 | Arthrobacter<br>humicola           | gamma-<br>Hexachlorocyclohex<br>ane transport<br>system | Survival   |
| Bacillus toyonensis<br>2 | Arthrobacter<br>nitroguajacolicus  | gamma-<br>Hexachlorocyclohex<br>ane transport<br>system | Survival   |
| Bacillus toyonensis<br>2 | Bacillus aryabhatai<br>2           | gamma-<br>Hexachlorocyclohex<br>ane transport<br>system | Survival   |
| Bacillus toyonensis<br>2 | Rummeliibacillus<br>pycinus        | gamma-<br>Hexachlorocyclohex<br>ane transport<br>system | Survival   |
| Bacillus toyonensis<br>2 | Bacillus aryabhatai<br>3           | gamma-<br>Hexachlorocyclohex<br>ane transport<br>system | Survival   |

|                          |                                    |                                                                                                  |            |
|--------------------------|------------------------------------|--------------------------------------------------------------------------------------------------|------------|
| Bacillus toyonensis<br>2 | Arthrobacter<br>oxydans            | gamma-<br>Hexachlorocyclohex<br>ane transport<br>system                                          | Survival   |
| Bacillus toyonensis<br>2 | Bacillus simplex 2                 | gamma-<br>Hexachlorocyclohex<br>ane transport<br>system                                          | Survival   |
| Bacillus toyonensis<br>2 | Bacillus simplex 1                 | gamma-<br>Hexachlorocyclohex<br>ane transport<br>system                                          | Survival   |
| Bacillus toyonensis<br>3 | Bacillus toyonensis<br>2           | GraS-GraR (cationic<br>antimicrobial<br>peptide transport)<br>two-component<br>regulatory system | Survival   |
| Bacillus toyonensis<br>3 | Cupriavidus<br>basilensis          | gamma-<br>Hexachlorocyclohex<br>ane transport<br>system                                          | Extinction |
| Bacillus toyonensis<br>3 | Bacillus<br>amyloliquefaciens<br>1 | GraS-GraR (cationic<br>antimicrobial<br>peptide transport)<br>two-component<br>regulatory system | Survival   |
| Bacillus toyonensis<br>3 | Bacillus safensis                  | GraS-GraR (cationic<br>antimicrobial<br>peptide transport)<br>two-component<br>regulatory system | Survival   |
| Bacillus toyonensis<br>3 | Bacillus<br>amyloliquefaciens<br>2 | gamma-<br>Hexachlorocyclohex<br>ane transport<br>system                                          | Extinction |
| Bacillus toyonensis<br>3 | Bacillus altitudinis               | GraS-GraR (cationic<br>antimicrobial<br>peptide transport)<br>two-component<br>regulatory system | Survival   |

|                          |                                |                                              |          |
|--------------------------|--------------------------------|----------------------------------------------|----------|
| Bacillus toyonensis<br>3 | Bacillus flexus                | gamma-Hexachlorocyclohexane transport system | Survival |
| Bacillus toyonensis<br>3 | Bacillus aryabhatai<br>1       | gamma-Hexachlorocyclohexane transport system | Survival |
| Bacillus toyonensis<br>3 | Arthrobacter humicola          | gamma-Hexachlorocyclohexane transport system | Survival |
| Bacillus toyonensis<br>3 | Arthrobacter nitroguajacolicus | gamma-Hexachlorocyclohexane transport system | Survival |
| Bacillus toyonensis<br>3 | Bacillus aryabhatai<br>2       | gamma-Hexachlorocyclohexane transport system | Survival |
| Bacillus toyonensis<br>3 | Rummeliibacillus pycnus        | gamma-Hexachlorocyclohexane transport system | Survival |
| Bacillus toyonensis<br>3 | Bacillus aryabhatai<br>3       | gamma-Hexachlorocyclohexane transport system | Survival |
| Bacillus toyonensis<br>3 | Arthrobacter oxydans           | gamma-Hexachlorocyclohexane transport system | Survival |
| Bacillus toyonensis<br>3 | Bacillus simplex 2             | gamma-Hexachlorocyclohexane transport system | Survival |
| Bacillus toyonensis<br>3 | Bacillus simplex 1             | gamma-Hexachlorocyclohexane transport system | Survival |

|                        |                              |                                                                     |            |
|------------------------|------------------------------|---------------------------------------------------------------------|------------|
| Cupriavidus basilensis | Bacillus toyonensis 1        | gamma-Hexachlorocyclohexane transport system                        | Survival   |
| Cupriavidus basilensis | Bacillus toyonensis 2        | gamma-Hexachlorocyclohexane transport system                        | Survival   |
| Cupriavidus basilensis | Bacillus toyonensis 3        | gamma-Hexachlorocyclohexane transport system                        | Survival   |
| Cupriavidus basilensis | Bacillus amyloliquefaciens 1 | gamma-Hexachlorocyclohexane transport system                        | Extinction |
| Cupriavidus basilensis | Bacillus safensis            | gamma-Hexachlorocyclohexane transport system                        | Survival   |
| Cupriavidus basilensis | Bacillus amyloliquefaciens 2 | Glutamate transport system                                          | Survival   |
| Cupriavidus basilensis | Bacillus altitudinis         | gamma-Hexachlorocyclohexane transport system                        | Survival   |
| Cupriavidus basilensis | Bacillus flexus              | Glutamate transport system                                          | Survival   |
| Cupriavidus basilensis | Bacillus aryabhatai 1        | Glutamate transport system                                          | Survival   |
| Cupriavidus basilensis | Arthrobacter humicola        | Cationic antimicrobial peptide (CAMP) resistance, VraFG transporter | Survival   |

|                              |                                |                                                                                      |            |
|------------------------------|--------------------------------|--------------------------------------------------------------------------------------|------------|
| Cupriavidus basilensis       | Arthrobacter nitroguajacolicus | Cationic antimicrobial peptide (CAMP) resistance, VraFG transporter                  | Survival   |
| Cupriavidus basilensis       | Bacillus aryabhatai 2          | Glutamate transport system                                                           | Survival   |
| Cupriavidus basilensis       | Rummeliibacillus pycnus        | Glutamate transport system                                                           | Survival   |
| Cupriavidus basilensis       | Bacillus aryabhatai 3          | Glutamate transport system                                                           | Survival   |
| Cupriavidus basilensis       | Arthrobacter oxydans           | Cationic antimicrobial peptide (CAMP) resistance, VraFG transporter                  | Survival   |
| Cupriavidus basilensis       | Bacillus simplex 2             | Cationic antimicrobial peptide (CAMP) resistance, VraFG transporter                  | Survival   |
| Cupriavidus basilensis       | Bacillus simplex 1             | Glutamate transport system                                                           | Survival   |
| Bacillus amyloliquefaciens 1 | Bacillus toyonensis 1          | GraS-GraR (cationic antimicrobial peptide transport) two-component regulatory system | Extinction |
| Bacillus amyloliquefaciens 1 | Bacillus toyonensis 2          | Glutamate/aspartate transport system                                                 | Extinction |
| Bacillus amyloliquefaciens 1 | Bacillus toyonensis 3          | GraS-GraR (cationic antimicrobial peptide transport) two-component regulatory system | Extinction |
| Bacillus amyloliquefaciens 1 | Cupriavidus basilensis         | gamma-Hexachlorocyclohexane transport system                                         | Extinction |

|                              |                                |                                              |            |
|------------------------------|--------------------------------|----------------------------------------------|------------|
| Bacillus amyloliquefaciens 1 | Bacillus safensis              | Glycerol transport system                    | Extinction |
| Bacillus amyloliquefaciens 1 | Bacillus altitudinis           | Iron complex transport system                | Survival   |
| Bacillus amyloliquefaciens 1 | Bacillus flexus                | gamma-Hexachlorocyclohexane transport system | Survival   |
| Bacillus amyloliquefaciens 1 | Bacillus aryabhatai 1          | gamma-Hexachlorocyclohexane transport system | Survival   |
| Bacillus amyloliquefaciens 1 | Arthrobacter humicola          | gamma-Hexachlorocyclohexane transport system | Survival   |
| Bacillus amyloliquefaciens 1 | Arthrobacter nitroguajacolicus | gamma-Hexachlorocyclohexane transport system | Survival   |
| Bacillus amyloliquefaciens 1 | Bacillus aryabhatai 2          | gamma-Hexachlorocyclohexane transport system | Survival   |
| Bacillus amyloliquefaciens 1 | Rummeliibacillus pycnus        | gamma-Hexachlorocyclohexane transport system | Survival   |
| Bacillus amyloliquefaciens 1 | Bacillus aryabhatai 3          | gamma-Hexachlorocyclohexane transport system | Survival   |
| Bacillus amyloliquefaciens 1 | Arthrobacter oxydans           | gamma-Hexachlorocyclohexane transport system | Survival   |



|                              |                              |                                                                                      |            |
|------------------------------|------------------------------|--------------------------------------------------------------------------------------|------------|
| Bacillus amyloliquefaciens 1 | Bacillus simplex 2           | gamma-Hexachlorocyclohexane transport system                                         | Survival   |
| Bacillus amyloliquefaciens 1 | Bacillus simplex 1           | gamma-Hexachlorocyclohexane transport system                                         | Survival   |
| Bacillus safensis            | Bacillus toyonensis 1        | GraS-GraR (cationic antimicrobial peptide transport) two-component regulatory system | Extinction |
| Bacillus safensis            | Bacillus toyonensis 2        | Glycine betaine/proline transport system                                             | Extinction |
| Bacillus safensis            | Bacillus toyonensis 3        | Cationic antimicrobial peptide transport system                                      | Extinction |
| Bacillus safensis            | Cupriavidus basilensis       | gamma-Hexachlorocyclohexane transport system                                         | Survival   |
| Bacillus safensis            | Bacillus amyloliquefaciens 1 | Glycerol transport system                                                            | Extinction |
| Bacillus safensis            | Bacillus amyloliquefaciens 2 | gamma-Hexachlorocyclohexane transport system                                         | Extinction |
| Bacillus safensis            | Bacillus altitudinis         | gamma-Hexachlorocyclohexane transport system                                         | Survival   |
| Bacillus safensis            | Bacillus flexus              | gamma-Hexachlorocyclohexane transport system                                         | Survival   |

|                              |                                |                                              |            |
|------------------------------|--------------------------------|----------------------------------------------|------------|
| Bacillus safensis            | Bacillus aryabhatai 1          | gamma-Hexachlorocyclohexane transport system | Survival   |
| Bacillus safensis            | Arthrobacter humicola          | gamma-Hexachlorocyclohexane transport system | Survival   |
| Bacillus safensis            | Arthrobacter nitroguajacolicus | gamma-Hexachlorocyclohexane transport system | Survival   |
| Bacillus safensis            | Bacillus aryabhatai 2          | gamma-Hexachlorocyclohexane transport system | Survival   |
| Bacillus safensis            | Rummeliibacillus pycnus        | gamma-Hexachlorocyclohexane transport system | Survival   |
| Bacillus safensis            | Bacillus aryabhatai 3          | gamma-Hexachlorocyclohexane transport system | Survival   |
| Bacillus safensis            | Arthrobacter oxydans           | gamma-Hexachlorocyclohexane transport system | Survival   |
| Bacillus safensis            | Bacillus simplex 2             | gamma-Hexachlorocyclohexane transport system | Survival   |
| Bacillus safensis            | Bacillus simplex 1             | gamma-Hexachlorocyclohexane transport system | Survival   |
| Bacillus amyloliquefaciens 2 | Bacillus toyonensis 1          | gamma-Hexachlorocyclohexane transport system | Extinction |

|                                 |                                |                                                                     |            |
|---------------------------------|--------------------------------|---------------------------------------------------------------------|------------|
| Bacillus amyloliquefaciens<br>2 | Bacillus toyonensis<br>2       | gamma-Hexachlorocyclohexane transport system                        | Extinction |
| Bacillus amyloliquefaciens<br>2 | Bacillus toyonensis<br>3       | gamma-Hexachlorocyclohexane transport system                        | Extinction |
| Bacillus amyloliquefaciens<br>2 | Cupriavidus basilensis         | Fructose transport system                                           | Survival   |
| Bacillus amyloliquefaciens<br>2 | Bacillus safensis              | gamma-Hexachlorocyclohexane transport system                        | Extinction |
| Bacillus amyloliquefaciens<br>2 | Bacillus altitudinis           | gamma-Hexachlorocyclohexane transport system                        | Extinction |
| Bacillus amyloliquefaciens<br>2 | Bacillus flexus                | Cationic antimicrobial peptide (CAMP) resistance, VraFG transporter | Survival   |
| Bacillus amyloliquefaciens<br>2 | Bacillus aryabhatai<br>1       | alpha-1,4-Digalacturonate transport system                          | Survival   |
| Bacillus amyloliquefaciens<br>2 | Arthrobacter humicola          | Iron complex transport system                                       | Survival   |
| Bacillus amyloliquefaciens<br>2 | Arthrobacter nitroguajacolicus | BceS-BceR (bacitracin transport) two-component regulatory system    | Survival   |
| Bacillus amyloliquefaciens<br>2 | Bacillus aryabhatai<br>2       | alpha-1,4-Digalacturonate transport system                          | Survival   |

|                              |                              |                                                                                      |            |
|------------------------------|------------------------------|--------------------------------------------------------------------------------------|------------|
| Bacillus amyloliquefaciens 2 | Rummeliibacillus pycnus      | Cationic antimicrobial peptide (CAMP) resistance, VraFG transporter                  | Survival   |
| Bacillus amyloliquefaciens 2 | Bacillus aryabhatai 3        | Cationic antimicrobial peptide (CAMP) resistance, VraFG transporter                  | Survival   |
| Bacillus amyloliquefaciens 2 | Arthrobacter oxydans         | Capsular polysaccharide transport system                                             | Survival   |
| Bacillus amyloliquefaciens 2 | Bacillus simplex 2           | AlgE-type Mannuronan C-5-Epimerase transport system                                  | Survival   |
| Bacillus amyloliquefaciens 2 | Bacillus simplex 1           | AlgE-type Mannuronan C-5-Epimerase transport system                                  | Survival   |
| Bacillus altitudinis         | Bacillus toyonensis 1        | GraS-GraR (cationic antimicrobial peptide transport) two-component regulatory system | Extinction |
| Bacillus altitudinis         | Bacillus toyonensis 2        | Glutamate/aspartate transport system                                                 | Extinction |
| Bacillus altitudinis         | Bacillus toyonensis 3        | Cationic antimicrobial peptide transport system                                      | Extinction |
| Bacillus altitudinis         | Cupriavidus basilensis       | gamma-Hexachlorocyclohexane transport system                                         | Survival   |
| Bacillus altitudinis         | Bacillus amyloliquefaciens 1 | D-Allose transport system                                                            | Survival   |

|                      |                                |                                              |            |
|----------------------|--------------------------------|----------------------------------------------|------------|
| Bacillus altitudinis | Bacillus safensis              | gamma-Hexachlorocyclohexane transport system | Extinction |
| Bacillus altitudinis | Bacillus amyloliquefaciens 2   | gamma-Hexachlorocyclohexane transport system | Extinction |
| Bacillus altitudinis | Bacillus flexus                | gamma-Hexachlorocyclohexane transport system | Survival   |
| Bacillus altitudinis | Bacillus aryabhatai 1          | gamma-Hexachlorocyclohexane transport system | Survival   |
| Bacillus altitudinis | Arthrobacter humicola          | gamma-Hexachlorocyclohexane transport system | Survival   |
| Bacillus altitudinis | Arthrobacter nitroguajacolicus | gamma-Hexachlorocyclohexane transport system | Survival   |
| Bacillus altitudinis | Bacillus aryabhatai 2          | gamma-Hexachlorocyclohexane transport system | Survival   |
| Bacillus altitudinis | Rummeliibacillus pycnus        | gamma-Hexachlorocyclohexane transport system | Survival   |
| Bacillus altitudinis | Bacillus aryabhatai 3          | gamma-Hexachlorocyclohexane transport system | Survival   |
| Bacillus altitudinis | Arthrobacter oxydans           | gamma-Hexachlorocyclohexane transport system | Survival   |

|                      |                              |                                                                     |            |
|----------------------|------------------------------|---------------------------------------------------------------------|------------|
| Bacillus altitudinis | Bacillus simplex 2           | gamma-Hexachlorocyclohexane transport system                        | Survival   |
| Bacillus altitudinis | Bacillus simplex 1           | gamma-Hexachlorocyclohexane transport system                        | Survival   |
| Bacillus flexus      | Bacillus toyonensis 1        | gamma-Hexachlorocyclohexane transport system                        | Extinction |
| Bacillus flexus      | Bacillus toyonensis 2        | gamma-Hexachlorocyclohexane transport system                        | Extinction |
| Bacillus flexus      | Bacillus toyonensis 3        | gamma-Hexachlorocyclohexane transport system                        | Extinction |
| Bacillus flexus      | Cupriavidus basilensis       | alpha-1,4-Digalacturonate transport system                          | Extinction |
| Bacillus flexus      | Bacillus amyloliquefaciens 1 | gamma-Hexachlorocyclohexane transport system                        | Extinction |
| Bacillus flexus      | Bacillus safensis            | gamma-Hexachlorocyclohexane transport system                        | Extinction |
| Bacillus flexus      | Bacillus amyloliquefaciens 2 | Cationic antimicrobial peptide (CAMP) resistance, VraFG transporter | Extinction |
| Bacillus flexus      | Bacillus altitudinis         | gamma-Hexachlorocyclohexane transport system                        | Extinction |

|                 |                                |                                                                     |            |
|-----------------|--------------------------------|---------------------------------------------------------------------|------------|
| Bacillus flexus | Bacillus aryabhatai 1          | Cationic antimicrobial peptide (CAMP) resistance, VraFG transporter | Survival   |
| Bacillus flexus | Arthrobacter humicola          | Cationic antimicrobial peptide (CAMP) resistance, VraFG transporter | Survival   |
| Bacillus flexus | Arthrobacter nitroguajacolicus | Fluoroquinolone transport system                                    | Extinction |
| Bacillus flexus | Bacillus aryabhatai 2          | Cationic antimicrobial peptide (CAMP) resistance, VraFG transporter | Survival   |
| Bacillus flexus | Rummeliibacillus pycnus        | alpha-1,4-Digalacturonate transport system                          | Survival   |
| Bacillus flexus | Bacillus aryabhatai 3          | D-Allose transport system                                           | Survival   |
| Bacillus flexus | Arthrobacter oxydans           | Cationic antimicrobial peptide (CAMP) resistance, VraFG transporter | Survival   |
| Bacillus flexus | Bacillus simplex 2             | Cationic antimicrobial peptide (CAMP) resistance, VraFG transporter | Survival   |
| Bacillus flexus | Bacillus simplex 1             | Cationic antimicrobial peptide (CAMP) resistance, VraFG transporter | Survival   |

|                          |                                 |                                                                     |            |
|--------------------------|---------------------------------|---------------------------------------------------------------------|------------|
| Bacillus aryabhatai<br>1 | Bacillus toyonensis<br>1        | gamma-Hexachlorocyclohexane transport system                        | Extinction |
| Bacillus aryabhatai<br>1 | Bacillus toyonensis<br>2        | gamma-Hexachlorocyclohexane transport system                        | Extinction |
| Bacillus aryabhatai<br>1 | Bacillus toyonensis<br>3        | gamma-Hexachlorocyclohexane transport system                        | Extinction |
| Bacillus aryabhatai<br>1 | Cupriavidus basiliensis         | alpha-1,4-Digalacturonate transport system                          | Extinction |
| Bacillus aryabhatai<br>1 | Bacillus amyloliquefaciens<br>1 | gamma-Hexachlorocyclohexane transport system                        | Extinction |
| Bacillus aryabhatai<br>1 | Bacillus safensis               | gamma-Hexachlorocyclohexane transport system                        | Extinction |
| Bacillus aryabhatai<br>1 | Bacillus amyloliquefaciens<br>2 | Cationic antimicrobial peptide (CAMP) resistance, VraFG transporter | Extinction |
| Bacillus aryabhatai<br>1 | Bacillus altitudinis            | gamma-Hexachlorocyclohexane transport system                        | Extinction |
| Bacillus aryabhatai<br>1 | Bacillus flexus                 | Cationic antimicrobial peptide (CAMP) resistance, VraFG transporter | Extinction |



|                          |                                   |                                                                                 |            |
|--------------------------|-----------------------------------|---------------------------------------------------------------------------------|------------|
| Bacillus aryabhatai<br>1 | Arthrobacter<br>humicola          | Cationic<br>antimicrobial<br>peptide (CAMP)<br>resistance, VraFG<br>transporter | Survival   |
| Bacillus aryabhatai<br>1 | Arthrobacter<br>nitroguajacolicus | Cationic<br>antimicrobial<br>peptide (CAMP)<br>resistance, VraFG<br>transporter | Extinction |
| Bacillus aryabhatai<br>1 | Bacillus aryabhatai<br>2          | Fluoroquinolone<br>transport system                                             | Survival   |
| Bacillus aryabhatai<br>1 | Rummeliibacillus<br>pycnus        | alpha-1,4-<br>Digalacturonate<br>transport system                               | Survival   |
| Bacillus aryabhatai<br>1 | Bacillus aryabhatai<br>3          | alpha-1,4-<br>Digalacturonate<br>transport system                               | Extinction |
| Bacillus aryabhatai<br>1 | Arthrobacter<br>oxydans           | Cationic<br>antimicrobial<br>peptide (CAMP)<br>resistance, VraFG<br>transporter | Survival   |
| Bacillus aryabhatai<br>1 | Bacillus simplex 2                | Cationic<br>antimicrobial<br>peptide (CAMP)<br>resistance, VraFG<br>transporter | Survival   |
| Bacillus aryabhatai<br>1 | Bacillus simplex 1                | Cationic<br>antimicrobial<br>peptide (CAMP)<br>resistance, VraFG<br>transporter | Survival   |
| Arthrobacter<br>humicola | Bacillus toyonensis<br>1          | gamma-<br>Hexachlorocyclohex<br>ane transport<br>system                         | Extinction |

|                       |                                 |                                                                  |            |
|-----------------------|---------------------------------|------------------------------------------------------------------|------------|
| Arthrobacter humicola | Bacillus toyonensis<br>2        | gamma-Hexachlorocyclohexane transport system                     | Extinction |
| Arthrobacter humicola | Bacillus toyonensis<br>3        | gamma-Hexachlorocyclohexane transport system                     | Extinction |
| Arthrobacter humicola | Cupriavidus basilensis          | Fructose transport system                                        | Survival   |
| Arthrobacter humicola | Bacillus amyloliquefaciens<br>1 | gamma-Hexachlorocyclohexane transport system                     | Extinction |
| Arthrobacter humicola | Bacillus safensis               | gamma-Hexachlorocyclohexane transport system                     | Extinction |
| Arthrobacter humicola | Bacillus amyloliquefaciens<br>2 | Iron complex transport system                                    | Extinction |
| Arthrobacter humicola | Bacillus altitudinis            | gamma-Hexachlorocyclohexane transport system                     | Extinction |
| Arthrobacter humicola | Bacillus flexus                 | Fluoroquinolone transport system                                 | Survival   |
| Arthrobacter humicola | Bacillus aryabhatai<br>1        | Fluoroquinolone transport system                                 | Extinction |
| Arthrobacter humicola | Arthrobacter nitroguajacolicus  | BceS-BceR (bacitracin transport) two-component regulatory system | Survival   |
| Arthrobacter humicola | Bacillus aryabhatai<br>2        | Fluoroquinolone transport system                                 | Survival   |
| Arthrobacter humicola | Rummeliibacillus pycnus         | Fluoroquinolone transport system                                 | Extinction |
| Arthrobacter humicola | Bacillus aryabhatai<br>3        | Fluoroquinolone transport system                                 | Survival   |

|                                |                              |                                                     |            |
|--------------------------------|------------------------------|-----------------------------------------------------|------------|
| Arthrobacter humicola          | Arthrobacter oxydans         | Iron complex transport system                       | Survival   |
| Arthrobacter humicola          | Bacillus simplex 2           | D-Methionine transport system                       | Survival   |
| Arthrobacter humicola          | Bacillus simplex 1           | Fluoroquinolone transport system                    | Survival   |
| Arthrobacter nitroguajacolicus | Bacillus toyonensis 1        | gamma-Hexachlorocyclohexane transport system        | Extinction |
| Arthrobacter nitroguajacolicus | Bacillus toyonensis 2        | gamma-Hexachlorocyclohexane transport system        | Extinction |
| Arthrobacter nitroguajacolicus | Bacillus toyonensis 3        | gamma-Hexachlorocyclohexane transport system        | Extinction |
| Arthrobacter nitroguajacolicus | Cupriavidus basilensis       | Fluoroquinolone transport system                    | Survival   |
| Arthrobacter nitroguajacolicus | Bacillus amyloliquefaciens 1 | gamma-Hexachlorocyclohexane transport system        | Extinction |
| Arthrobacter nitroguajacolicus | Bacillus safensis            | gamma-Hexachlorocyclohexane transport system        | Extinction |
| Arthrobacter nitroguajacolicus | Bacillus amyloliquefaciens 2 | AlgE-type Mannuronan C-5-Epimerase transport system | Extinction |
| Arthrobacter nitroguajacolicus | Bacillus altitudinis         | gamma-Hexachlorocyclohexane transport system        | Extinction |
| Arthrobacter nitroguajacolicus | Bacillus flexus              | Fluoroquinolone transport system                    | Extinction |
| Arthrobacter nitroguajacolicus | Bacillus aryabhatai 1        | Fluoroquinolone transport system                    | Extinction |

|                                |                         |                                                                     |            |
|--------------------------------|-------------------------|---------------------------------------------------------------------|------------|
| Arthrobacter nitroguajacolicus | Arthrobacter humicola   | Branched-chain amino acid transport system                          | Extinction |
| Arthrobacter nitroguajacolicus | Bacillus aryabhatai 2   | Fluoroquinolone transport system                                    | Survival   |
| Arthrobacter nitroguajacolicus | Rummeliibacillus pycnus | Cationic antimicrobial peptide (CAMP) resistance, VraFG transporter | Extinction |
| Arthrobacter nitroguajacolicus | Bacillus aryabhatai 3   | Fluoroquinolone transport system                                    | Survival   |
| Arthrobacter nitroguajacolicus | Arthrobacter oxydans    | Iron complex transport system                                       | Survival   |
| Arthrobacter nitroguajacolicus | Bacillus simplex 2      | AlgE-type Mannuronan C-5-Epimerase transport system                 | Survival   |
| Arthrobacter nitroguajacolicus | Bacillus simplex 1      | BceS-BceR (bacitracin transport) two-component regulatory system    | Survival   |
| Bacillus aryabhatai 2          | Bacillus toyonensis 1   | gamma-Hexachlorocyclohexane transport system                        | Extinction |
| Bacillus aryabhatai 2          | Bacillus toyonensis 2   | gamma-Hexachlorocyclohexane transport system                        | Extinction |
| Bacillus aryabhatai 2          | Bacillus toyonensis 3   | gamma-Hexachlorocyclohexane transport system                        | Extinction |
| Bacillus aryabhatai 2          | Cupriavidus basilensis  | Fluoroquinolone transport system                                    | Survival   |

|                          |                                    |                                                                                 |            |
|--------------------------|------------------------------------|---------------------------------------------------------------------------------|------------|
| Bacillus aryabhatai<br>2 | Bacillus<br>amyloliquefaciens<br>1 | gamma-<br>Hexachlorocyclohex<br>ane transport<br>system                         | Extinction |
| Bacillus aryabhatai<br>2 | Bacillus safensis                  | gamma-<br>Hexachlorocyclohex<br>ane transport<br>system                         | Extinction |
| Bacillus aryabhatai<br>2 | Bacillus<br>amyloliquefaciens<br>2 | Cationic<br>antimicrobial<br>peptide (CAMP)<br>resistance, VraFG<br>transporter | Extinction |
| Bacillus aryabhatai<br>2 | Bacillus altitudinis               | gamma-<br>Hexachlorocyclohex<br>ane transport<br>system                         | Extinction |
| Bacillus aryabhatai<br>2 | Bacillus flexus                    | gamma-<br>Hexachlorocyclohex<br>ane transport<br>system                         | Extinction |
| Bacillus aryabhatai<br>2 | Bacillus aryabhatai<br>1           | BceS-BceR<br>(bacitracin<br>transport) two-<br>component<br>regulatory system   | Survival   |
| Bacillus aryabhatai<br>2 | Arthrobacter<br>humicola           | Cationic<br>antimicrobial<br>peptide (CAMP)<br>resistance, VraFG<br>transporter | Survival   |
| Bacillus aryabhatai<br>2 | Arthrobacter<br>nitroguajacolicus  | Fluoroquinolone<br>transport system                                             | Extinction |
| Bacillus aryabhatai<br>2 | Rummeliibacillus<br>pycinus        | alpha-1,4-<br>Digalacturonate<br>transport system                               | Extinction |

|                          |                          |                                                                     |            |
|--------------------------|--------------------------|---------------------------------------------------------------------|------------|
| Bacillus aryabhatai<br>2 | Bacillus aryabhatai<br>3 | Cationic antimicrobial peptide (CAMP) resistance, VraFG transporter | Extinction |
| Bacillus aryabhatai<br>2 | Arthrobacter oxydans     | Cationic antimicrobial peptide (CAMP) resistance, VraFG transporter | Survival   |
| Bacillus aryabhatai<br>2 | Bacillus simplex 2       | Cationic antimicrobial peptide (CAMP) resistance, VraFG transporter | Survival   |
| Bacillus aryabhatai<br>2 | Bacillus simplex 1       | Cationic antimicrobial peptide (CAMP) resistance, VraFG transporter | Survival   |
| Rummeliibacillus pycnus  | Bacillus toyonensis<br>1 | gamma-Hexachlorocyclohexane transport system                        | Extinction |
| Rummeliibacillus pycnus  | Bacillus toyonensis<br>2 | gamma-Hexachlorocyclohexane transport system                        | Extinction |
| Rummeliibacillus pycnus  | Bacillus toyonensis<br>3 | gamma-Hexachlorocyclohexane transport system                        | Extinction |
| Rummeliibacillus pycnus  | Cupriavidus basilensis   | BceS-BceR (bacitracin transport) two-component regulatory system    | Extinction |

|                         |                                |                                                                     |            |
|-------------------------|--------------------------------|---------------------------------------------------------------------|------------|
| Rummeliibacillus pycnus | Bacillus amyloliquefaciens 1   | gamma-Hexachlorocyclohexane transport system                        | Extinction |
| Rummeliibacillus pycnus | Bacillus safensis              | gamma-Hexachlorocyclohexane transport system                        | Extinction |
| Rummeliibacillus pycnus | Bacillus amyloliquefaciens 2   | Cationic antimicrobial peptide (CAMP) resistance, VraFG transporter | Extinction |
| Rummeliibacillus pycnus | Bacillus altitudinis           | gamma-Hexachlorocyclohexane transport system                        | Extinction |
| Rummeliibacillus pycnus | Bacillus flexus                | alpha-1,4-Digalacturonate transport system                          | Extinction |
| Rummeliibacillus pycnus | Bacillus aryabhatai 1          | alpha-1,4-Digalacturonate transport system                          | Extinction |
| Rummeliibacillus pycnus | Arthrobacter humicola          | Cationic antimicrobial peptide (CAMP) resistance, VraFG transporter | Survival   |
| Rummeliibacillus pycnus | Arthrobacter nitroguajacolicus | Fluoroquinolone transport system                                    | Survival   |
| Rummeliibacillus pycnus | Bacillus aryabhatai 2          | alpha-1,4-Digalacturonate transport system                          | Extinction |
| Rummeliibacillus pycnus | Bacillus aryabhatai 3          | alpha-1,4-Digalacturonate transport system                          | Extinction |

|                         |                              |                                                                     |            |
|-------------------------|------------------------------|---------------------------------------------------------------------|------------|
| Rummeliibacillus pycnus | Arthrobacter oxydans         | Cationic antimicrobial peptide (CAMP) resistance, VraFG transporter | Survival   |
| Rummeliibacillus pycnus | Bacillus simplex 2           | Cationic antimicrobial peptide (CAMP) resistance, VraFG transporter | Survival   |
| Rummeliibacillus pycnus | Bacillus simplex 1           | Cationic antimicrobial peptide (CAMP) resistance, VraFG transporter | Survival   |
| Bacillus aryabhatai 3   | Bacillus toyonensis 1        | gamma-Hexachlorocyclohexane transport system                        | Extinction |
| Bacillus aryabhatai 3   | Bacillus toyonensis 2        | gamma-Hexachlorocyclohexane transport system                        | Extinction |
| Bacillus aryabhatai 3   | Bacillus toyonensis 3        | gamma-Hexachlorocyclohexane transport system                        | Extinction |
| Bacillus aryabhatai 3   | Cupriavidus basilensis       | alpha-1,4-Digalacturonate transport system                          | Extinction |
| Bacillus aryabhatai 3   | Bacillus amyloliquefaciens 1 | gamma-Hexachlorocyclohexane transport system                        | Extinction |
| Bacillus aryabhatai 3   | Bacillus safensis            | gamma-Hexachlorocyclohexane transport system                        | Extinction |



|                          |                                    |                                                                                 |            |
|--------------------------|------------------------------------|---------------------------------------------------------------------------------|------------|
| Bacillus aryabhatai<br>3 | Bacillus<br>amyloliquefaciens<br>2 | Cationic<br>antimicrobial<br>peptide (CAMP)<br>resistance, VraFG<br>transporter | Extinction |
| Bacillus aryabhatai<br>3 | Bacillus altitudinis               | gamma-<br>Hexachlorocyclohex<br>ane transport<br>system                         | Extinction |
| Bacillus aryabhatai<br>3 | Bacillus flexus                    | Cationic<br>antimicrobial<br>peptide (CAMP)<br>resistance, VraFG<br>transporter | Extinction |
| Bacillus aryabhatai<br>3 | Bacillus aryabhatai<br>1           | gamma-<br>Hexachlorocyclohex<br>ane transport<br>system                         | Extinction |
| Bacillus aryabhatai<br>3 | Arthrobacter<br>humicola           | Cationic<br>antimicrobial<br>peptide (CAMP)<br>resistance, VraFG<br>transporter | Extinction |
| Bacillus aryabhatai<br>3 | Arthrobacter<br>nitroguajacolicus  | Fluoroquinolone<br>transport system                                             | Extinction |
| Bacillus aryabhatai<br>3 | Bacillus aryabhatai<br>2           | BceS-BceR<br>(bacitracin<br>transport) two-<br>component<br>regulatory system   | Extinction |
| Bacillus aryabhatai<br>3 | Rummeliibacillus<br>pycnus         | alpha-1,4-<br>Digalacturonate<br>transport system                               | Extinction |
| Bacillus aryabhatai<br>3 | Arthrobacter<br>oxydans            | Cationic<br>antimicrobial<br>peptide (CAMP)<br>resistance, VraFG<br>transporter | Survival   |

|                          |                                 |                                                                     |            |
|--------------------------|---------------------------------|---------------------------------------------------------------------|------------|
| Bacillus aryabhatai<br>3 | Bacillus simplex 2              | Cationic antimicrobial peptide (CAMP) resistance, VraFG transporter | Survival   |
| Bacillus aryabhatai<br>3 | Bacillus simplex 1              | Cationic antimicrobial peptide (CAMP) resistance, VraFG transporter | Survival   |
| Arthrobacter oxydans     | Bacillus toyonensis<br>1        | gamma-Hexachlorocyclohexane transport system                        | Extinction |
| Arthrobacter oxydans     | Bacillus toyonensis<br>2        | gamma-Hexachlorocyclohexane transport system                        | Extinction |
| Arthrobacter oxydans     | Bacillus toyonensis<br>3        | gamma-Hexachlorocyclohexane transport system                        | Extinction |
| Arthrobacter oxydans     | Cupriavidus basiliensis         | Fluoroquinolone transport system                                    | Extinction |
| Arthrobacter oxydans     | Bacillus amyloliquefaciens<br>1 | gamma-Hexachlorocyclohexane transport system                        | Extinction |
| Arthrobacter oxydans     | Bacillus safensis               | gamma-Hexachlorocyclohexane transport system                        | Extinction |
| Arthrobacter oxydans     | Bacillus amyloliquefaciens<br>2 | Adhesin protein transport system                                    | Extinction |
| Arthrobacter oxydans     | Bacillus altitudinis            | gamma-Hexachlorocyclohexane transport system                        | Extinction |

|                      |                                |                                                                     |            |
|----------------------|--------------------------------|---------------------------------------------------------------------|------------|
| Arthrobacter oxydans | Bacillus flexus                | Fluoroquinolone transport system                                    | Extinction |
| Arthrobacter oxydans | Bacillus aryabhatai 1          | Fluoroquinolone transport system                                    | Extinction |
| Arthrobacter oxydans | Arthrobacter humicola          | Iron complex transport system                                       | Extinction |
| Arthrobacter oxydans | Arthrobacter nitroguajacolicus | Iron complex transport system                                       | Extinction |
| Arthrobacter oxydans | Bacillus aryabhatai 2          | Fluoroquinolone transport system                                    | Extinction |
| Arthrobacter oxydans | Rummeliibacillus pycnus        | Fructose transport system                                           | Extinction |
| Arthrobacter oxydans | Bacillus aryabhatai 3          | Iron complex transport system                                       | Survival   |
| Arthrobacter oxydans | Bacillus simplex 2             | Capsular polysaccharide transport system                            | Survival   |
| Arthrobacter oxydans | Bacillus simplex 1             | Fluoroquinolone transport system                                    | Survival   |
| Bacillus simplex 2   | Bacillus toyonensis 1          | gamma-Hexachlorocyclohexane transport system                        | Extinction |
| Bacillus simplex 2   | Bacillus toyonensis 2          | gamma-Hexachlorocyclohexane transport system                        | Extinction |
| Bacillus simplex 2   | Bacillus toyonensis 3          | gamma-Hexachlorocyclohexane transport system                        | Extinction |
| Bacillus simplex 2   | Cupriavidus basilensis         | Cationic antimicrobial peptide (CAMP) resistance, VraFG transporter | Extinction |
| Bacillus simplex 2   | Bacillus amyloliquefaciens 1   | gamma-Hexachlorocyclohexane transport system                        | Extinction |

|                    |                                |                                                                     |            |
|--------------------|--------------------------------|---------------------------------------------------------------------|------------|
| Bacillus simplex 2 | Bacillus safensis              | gamma-Hexachlorocyclohexane transport system                        | Extinction |
| Bacillus simplex 2 | Bacillus amyloliquefaciens 2   | BceS-BceR (bacitracin transport) two-component regulatory system    | Extinction |
| Bacillus simplex 2 | Bacillus altitudinis           | gamma-Hexachlorocyclohexane transport system                        | Extinction |
| Bacillus simplex 2 | Bacillus flexus                | Cationic antimicrobial peptide (CAMP) resistance, VraFG transporter | Extinction |
| Bacillus simplex 2 | Bacillus aryabhatai 1          | alpha-1,4-Digalacturonate transport system                          | Extinction |
| Bacillus simplex 2 | Arthrobacter humicola          | Iron complex transport system                                       | Extinction |
| Bacillus simplex 2 | Arthrobacter nitroguajacolicus | Fructose transport system                                           | Extinction |
| Bacillus simplex 2 | Bacillus aryabhatai 2          | alpha-1,4-Digalacturonate transport system                          | Extinction |
| Bacillus simplex 2 | Rummeliibacillus pycnus        | Cationic antimicrobial peptide (CAMP) resistance, VraFG transporter | Extinction |
| Bacillus simplex 2 | Bacillus aryabhatai 3          | Cationic antimicrobial peptide (CAMP) resistance, VraFG transporter | Extinction |

|                    |                              |                                                                  |            |
|--------------------|------------------------------|------------------------------------------------------------------|------------|
| Bacillus simplex 2 | Arthrobacter oxydans         | AlgE-type Mannuronan C-5-Epimerase transport system              | Survival   |
| Bacillus simplex 2 | Bacillus simplex 1           | BceS-BceR (bacitracin transport) two-component regulatory system | Extinction |
| Bacillus simplex 1 | Bacillus toyonensis 1        | gamma-Hexachlorocyclohexane transport system                     | Extinction |
| Bacillus simplex 1 | Bacillus toyonensis 2        | gamma-Hexachlorocyclohexane transport system                     | Extinction |
| Bacillus simplex 1 | Bacillus toyonensis 3        | gamma-Hexachlorocyclohexane transport system                     | Extinction |
| Bacillus simplex 1 | Cupriavidus basilensis       | Fructose transport system                                        | Extinction |
| Bacillus simplex 1 | Bacillus amyloliquefaciens 1 | gamma-Hexachlorocyclohexane transport system                     | Extinction |
| Bacillus simplex 1 | Bacillus safensis            | gamma-Hexachlorocyclohexane transport system                     | Extinction |
| Bacillus simplex 1 | Bacillus amyloliquefaciens 2 | AlgE-type Mannuronan C-5-Epimerase transport system              | Extinction |
| Bacillus simplex 1 | Bacillus altitudinis         | gamma-Hexachlorocyclohexane transport system                     | Extinction |

|                    |                                |                                                                     |            |
|--------------------|--------------------------------|---------------------------------------------------------------------|------------|
| Bacillus simplex 1 | Bacillus flexus                | Fructose transport system                                           | Extinction |
| Bacillus simplex 1 | Bacillus aryabhatai 1          | alpha-1,4-Digalacturonate transport system                          | Extinction |
| Bacillus simplex 1 | Arthrobacter humicola          | Iron complex transport system                                       | Extinction |
| Bacillus simplex 1 | Arthrobacter nitroguajacolicus | Fluoroquinolone transport system                                    | Extinction |
| Bacillus simplex 1 | Bacillus aryabhatai 2          | Cationic antimicrobial peptide (CAMP) resistance, VraFG transporter | Extinction |
| Bacillus simplex 1 | Rummeliibacillus pycnus        | Fructose transport system                                           | Extinction |
| Bacillus simplex 1 | Bacillus aryabhatai 3          | Cationic antimicrobial peptide (CAMP) resistance, VraFG transporter | Extinction |
| Bacillus simplex 1 | Arthrobacter oxydans           | Iron complex transport system                                       | Extinction |
| Bacillus simplex 1 | Bacillus simplex 2             | AlgE-type Mannuronan C-5-Epimerase transport system                 | Extinction |
